# Supplementary material for: Low HDL Cholesterol Efflux Capacity Indicates a Fatal Course of COVID-19
Source: MDPI journal article supplement (doi:10.3390/antiox11101858), 2022-09-21
Supplement: s1 [file s1]

## Low HDL cholesterol efflux capacity indicates a fatal course of COVID-19

### Supplementary Material

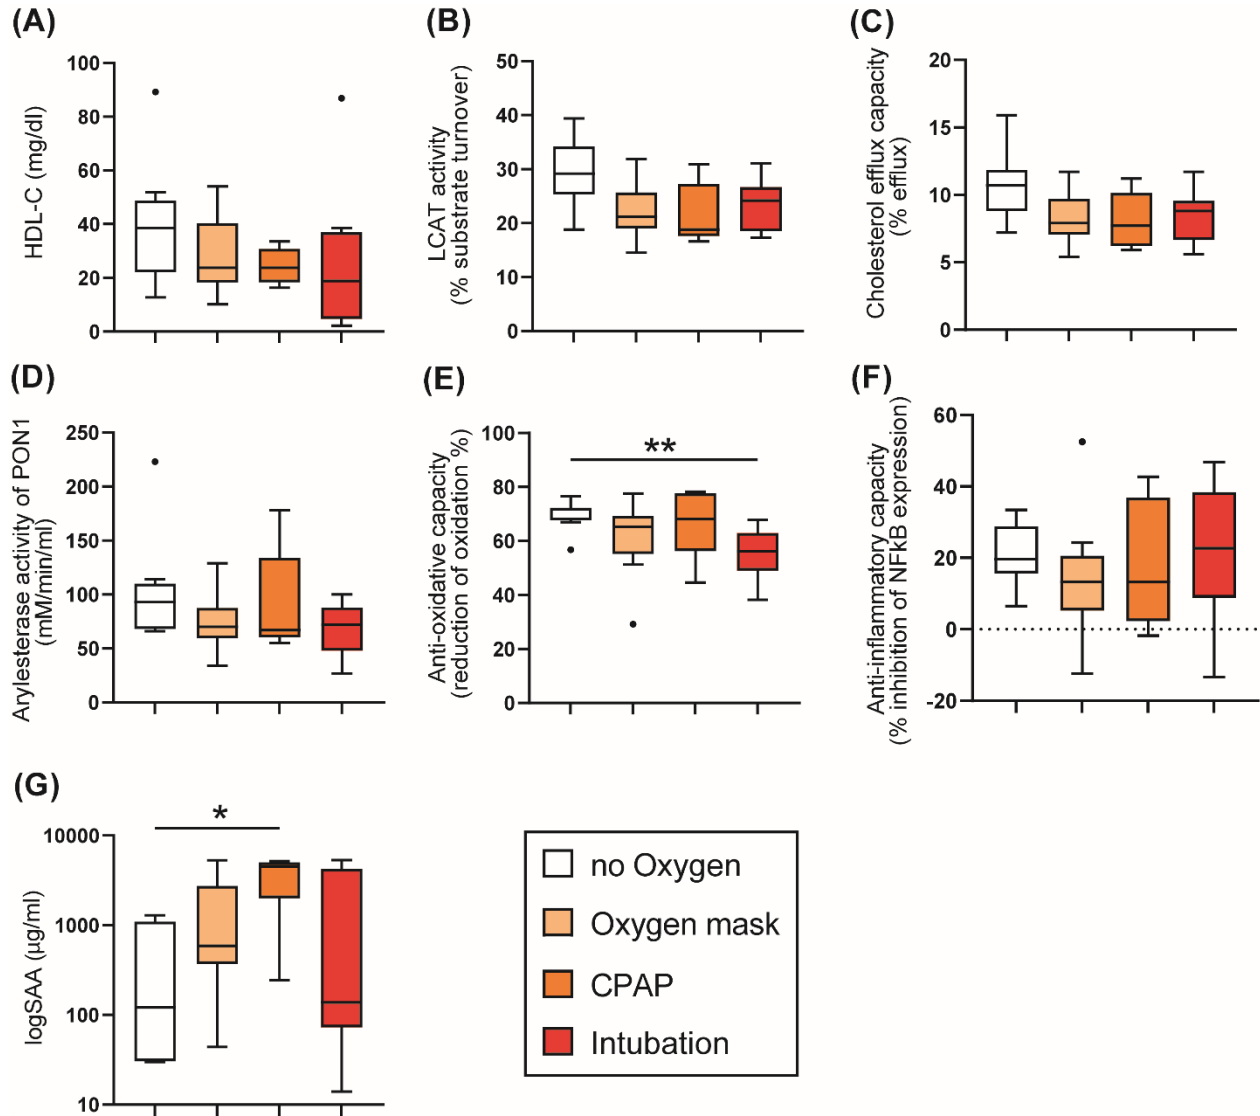

**Supplementary Figure S1.** HDL-related parameters and COVID-19 patients receiving no or different types of oxygen treatment. **(A)** HDL-cholesterol levels (mg/l); **(B)** LCAT activity (% substrate turnover); **(C)** Cholesterol efflux capacity (%); **(D)** arylesterase activity (mM/min/ml serum); **(E)** anti-oxidative capacity (% reduction of oxidation); **(F)** anti-inflammatory capacity (% inhibition of NFκB expression) ; **(G)** logSAA (μg/ml). Multiple comparisons were calculated with Kruskal-Wallis test. \* $p < 0.05$ , \*\* $p < 0.01$ .
